# Supplementary material for: Novel Class of Proteasome Inhibitors: In Silico and In Vitro Evaluation of Diverse Chloro(trifluoromethyl)aziridines
Source: MDPI journal article supplement (doi:10.3390/ijms232012363), 2022-10-15

**Figure S1.** Dose-response curves of compound **21**(A) and compound **22**(B) against CCRF-CEM, CEM/ADR5000 cell lines, and PBMCs.

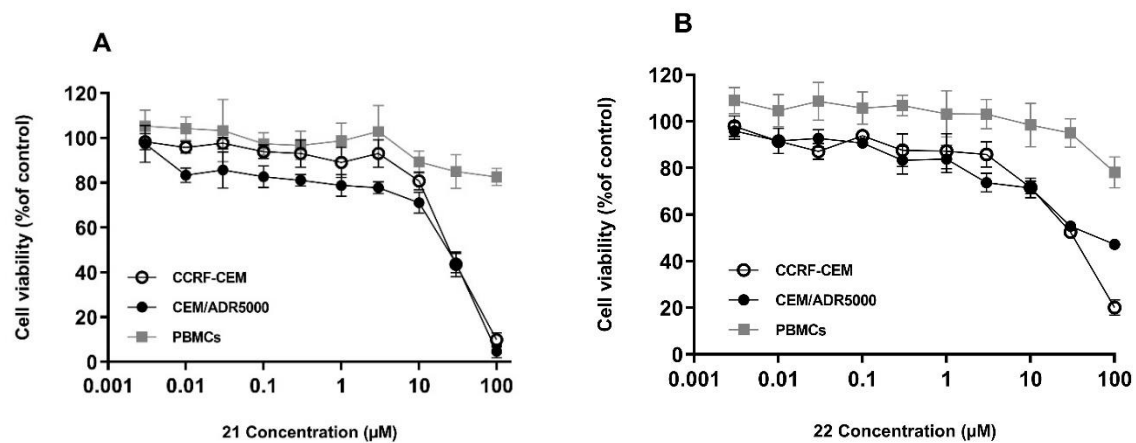

Supplement: s1 [file s1]
